# Supplementary material for: Improved photoelectric performance of all-inorganic perovskite through different additives for green light-emitting diodes
Source: Royal Society of Chemistry journal article supplement (doi:10.1039/c9ra05053a), 2019-01-01
Supplement: c9ra05053a1.pdf [file c9ra05053a1.pdf]

## Supporting Information

### Improved Photoelectric Performance of All-Inorganic Perovskite through Different Additives for Green Light-Emitting Diodes

*Xianqi Yang, Huaimin Gu\*, Shuti Li, Jihang Li, Hengzhi Shi, Jinyuan Zhang, Nana  
Liu, Zebing Liao, Wenzhu Xu, Yuan Tan*

<sup>1</sup> Institute of Semiconductor Science and Technology, South China Normal University,  
Guangzhou, Guangdong, China

\*Corresponding authors. E-mail: guhm139@139.com

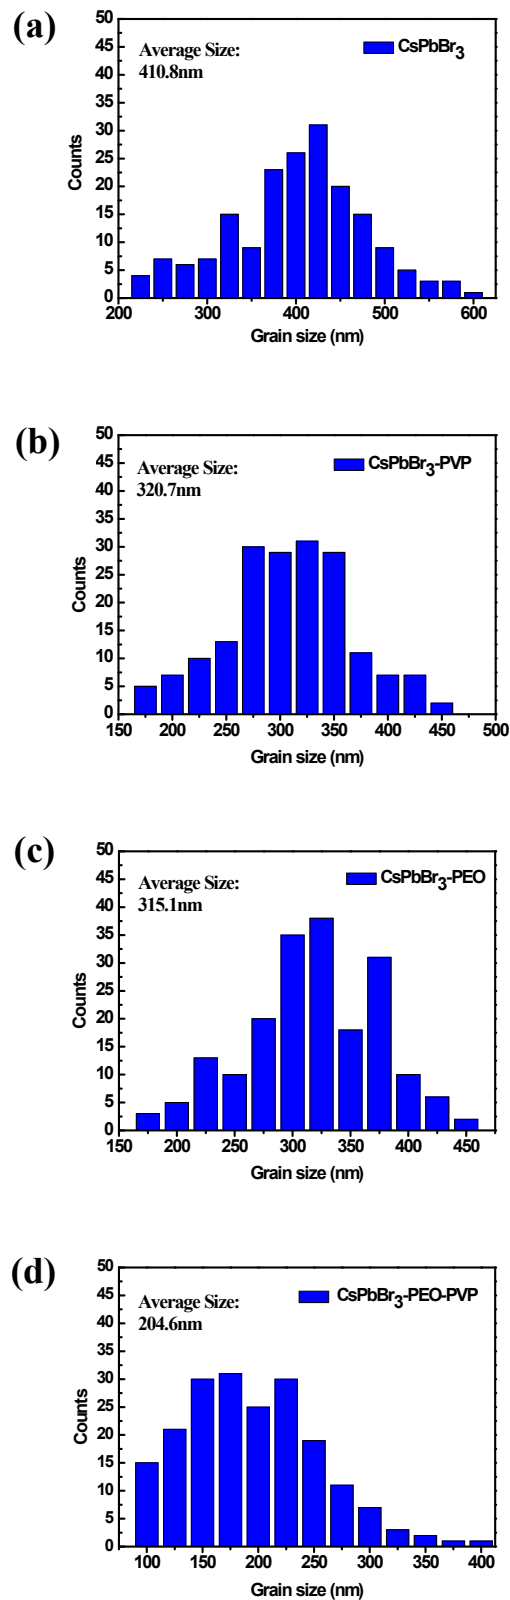

Figure S1. Grain size distribution of (a) the pure CsPbBr<sub>3</sub>, (b) CsPbBr<sub>3</sub>-PVP, (c) CsPbBr<sub>3</sub>-PEO and (d) CsPbBr<sub>3</sub>-PEO-PVP films.

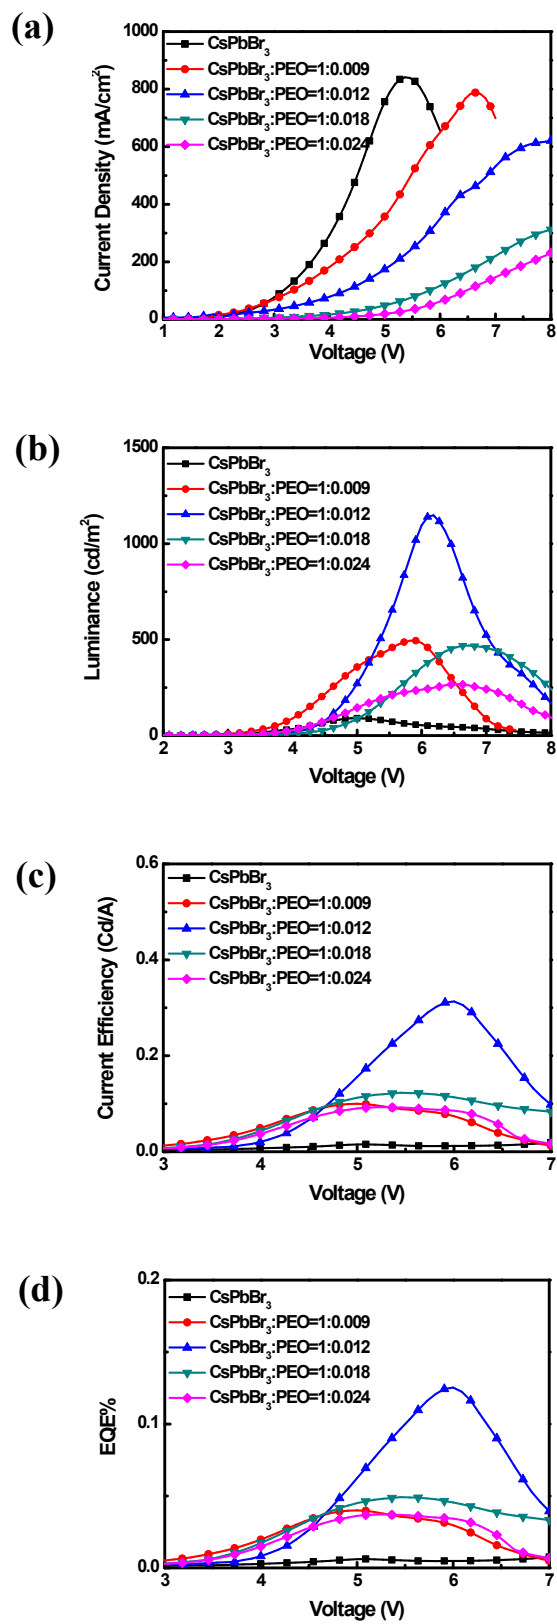

Figure S2. (a) current density, (b) luminance, (c) CE, and (d) EQE versus voltage characteristics of the CsPbBr<sub>3</sub>-PEO device with different PEO blending ratios.

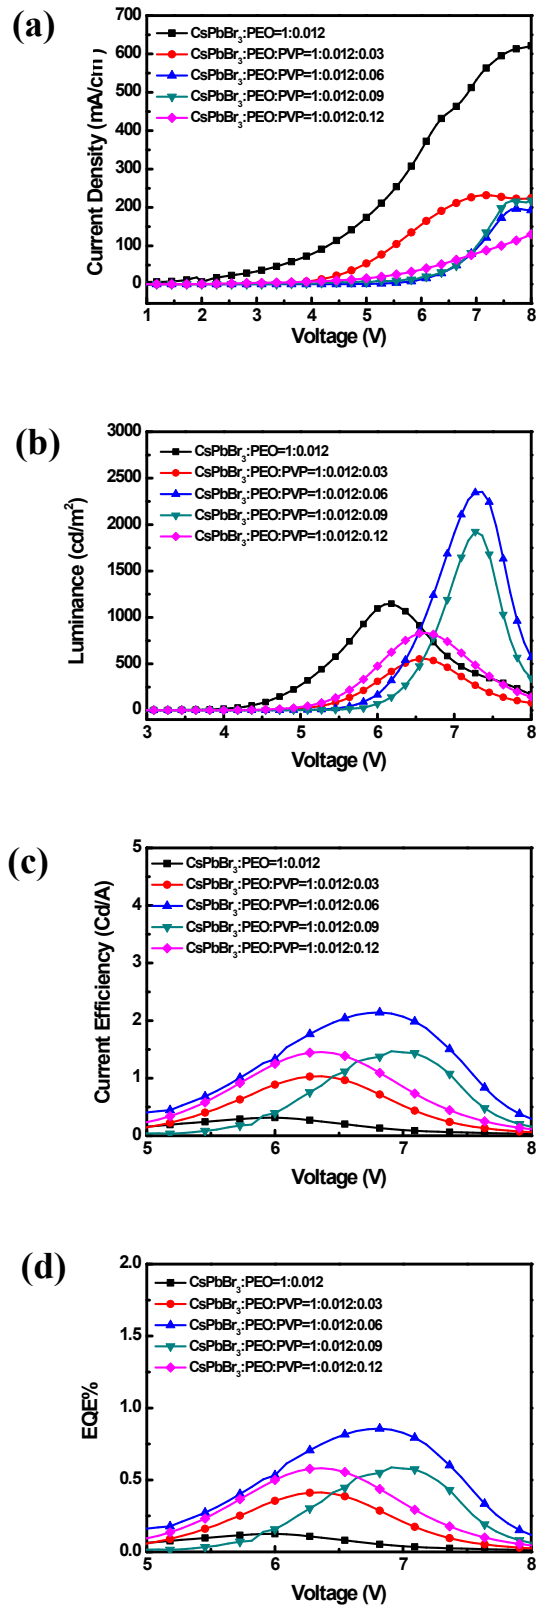

Figure S3. (a) current density, (b) luminance, (c) CE, and (d) EQE versus voltage characteristics of the CsPbBr<sub>3</sub>-PEO-PVP device with different PVP blending ratios.

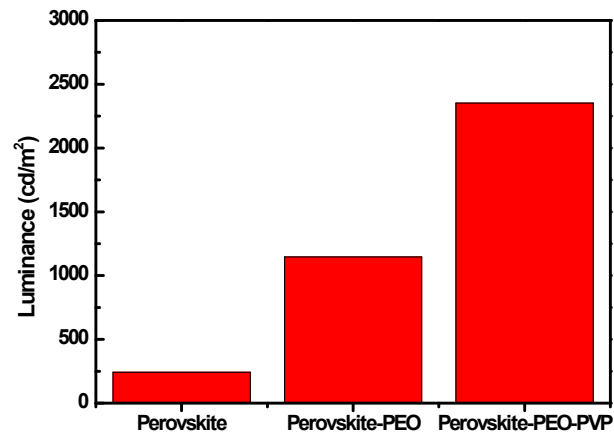

Figure S4. The optimal brightness observed in the device fabricated with three different types of emissive layers.

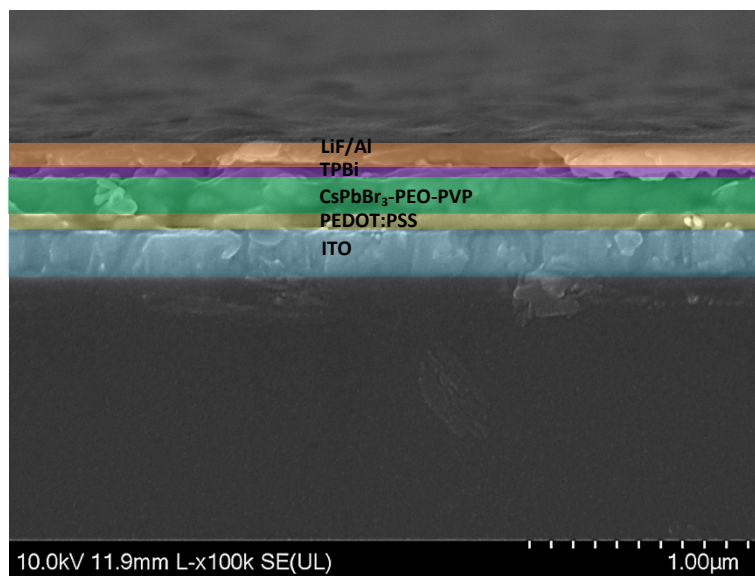

Figure S5. Cross-sectional SEM image of CsPbBr<sub>3</sub>-PEO-PVP (1:0.012:0.06) Perovskite LED device.

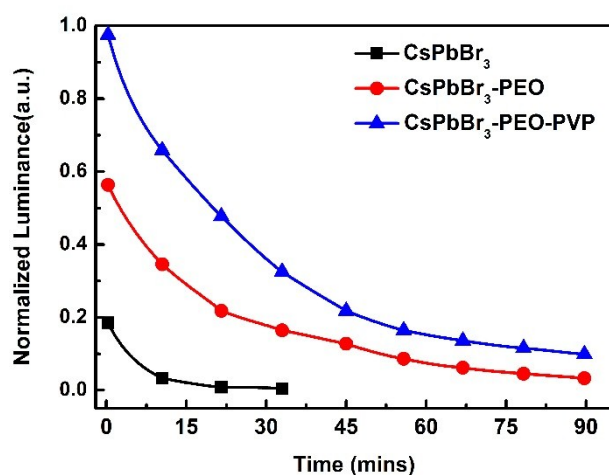

Figure S6. Stability of the Perovskite LED based on pure CsPbBr<sub>3</sub>, CsPbBr<sub>3</sub>-PEO (1:0.012), and CsPbBr<sub>3</sub>-PEO-PVP (1:0.012:0.06) films at a bias of 7V.

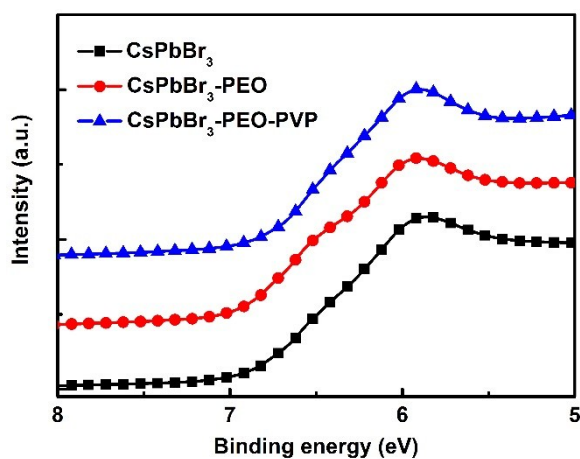

Figure S7. The UPS results of the pure CsPbBr<sub>3</sub>, CsPbBr<sub>3</sub>-PEO (1:0.012), and CsPbBr<sub>3</sub>-PEO-PVP (1:0.012:0.06) perovskite films.
